# Supplementary material for: Poly (vinyl alcohol)/β-Cyclodextrin Composite Fiber with Good Flame Retardant and Super-Smoke Suppression Properties
Source: PubMed Central journal article supplement (PMC7284589; doi:10.3390/polym12051078), 2020-05-08
Supplement: polymers-12-01078-s001.pdf [file polymers-12-01078-s001.pdf]

## Supporting Information

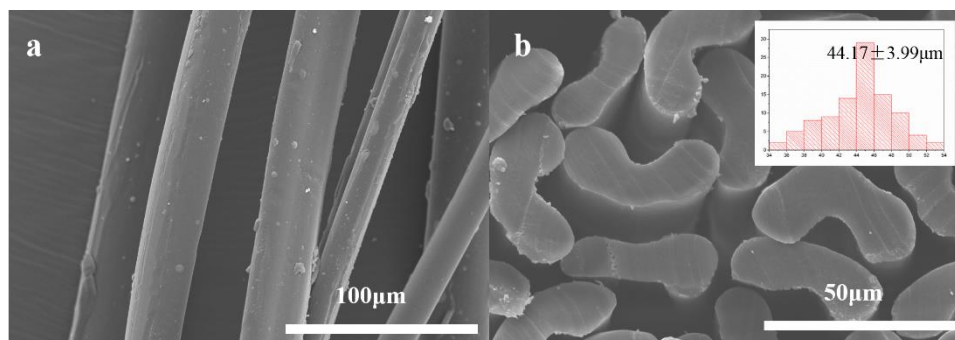

**Figure. S1** Surface and cross section of PVA/HDI, together with its diameter distribution.

**Table S1** Elemental analysis (EA) of PVA/HDI and PVA/CD/HDI.

| Sample       | C/%   | H/%  | O/%   | N/%  |
|--------------|-------|------|-------|------|
| PVA/HDI      | 51.21 | 9.22 | 39.04 | 0.53 |
| PVA/75CD/HDI | 45.84 | 8.47 | 42.82 | 2.87 |

**Table S2** Characteristic joints of TGA at air atmosphere.

| Sample       | T <sub>10%</sub> /°C | T <sub>peak loss</sub> /°C | T <sub>90%</sub> /°C | W <sub>550°C</sub> /% |
|--------------|----------------------|----------------------------|----------------------|-----------------------|
| PVA          | 223.3                | 238.3                      | 514.2                | 0.9                   |
| PVA/75CD     | 233.3                | 248.3                      | 535.8                | 5.5                   |
| PVA/75CD/HDI | 234.2                | 247.5                      | 527.5                | 6.4                   |

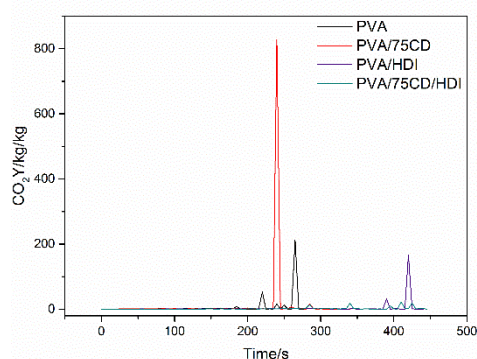

**Figure. S2** CO<sub>2</sub> yield (CO<sub>2</sub>Y) of PVA, PVA/75CD, PVA/HDI and PVA/75CD/HDI in cone calorimeter.
